# Supplementary material for: Breaking the coupling among N2 fully-connected linear polarization channels
Source: Research Square preprint supplement (doi:10.21203/rs.3.rs-6808515/v1), 2025-06-05
Supplement: Supplementary file 1 [file c4250a84f17207e334f3d198.docx]

**Supplementary Information for**

**Breaking the coupling among N2 fully-connected linear polarization channels**

Cong Liu1, Yueyi Yuan1,3,*, Lilin Li2,*, Yuxiang Wang1, Guohui Yang1, Kuang Zhang1,*

1 Department of Microwave Engineering, Harbin Institute of Technology, 150001 Harbin, China

2 The School of Electronic and Information Engineering, Beihang University, Beijing 100191, China

3 State Key Laboratory of Millimeter Waves

E-mail: [yuanyueyi@hit.edu.cn](mailto:yuanyueyi@hit.edu.cn), [lll_work@buaa.edu.cn](mailto:lll_work@buaa.edu.cn), [zhangkuang@hit.edu.cn](mailto:zhangkuang@hit.edu.cn)

**Note 1. Construction of** **polarization transformation equation**

**Note 2. Meta-atom with decoupled the physical symmetry**

**Note 3. Model of polarization diffraction neural network**

**Note 4. Fully-connected polarization transformation architecture for maximizing channel utilization**

**Note 5. Digital encryption details of the *N* = 3 fully-connected polarization architecture**

**Note 6. Inherent polarization coupling analysis for *N* = 3 fully-connected polarization channels with varied angular distributions**

**Note 7. Fabrication and measurement methods in microwave region.**

**Note 8. Supplement analyses and results of non-uniform fully-connected linear polarization regional holography**

**Note 9. Supplement analyses and results of amplitude-feature enhancement for fully-connected multiplexing network with non-uniformly sampled linear polarizations**

**Note 10. Verification of *N* = 4 fully-connected polarization multiplexing with uniformly sampled linear polarizations**

**Note 1. Construction of** **polarization transformation equation**

In this work, we focus on the polarization information of electromagnetic (EM) wave, which is described by the vector trajectory of electric field. When we ignore the time-harmonic property and the overall responses, the linear polarization plane wave can be simplified with only normalized amplitude as:

|  | (S1) |
| --- | --- |

where denotes the angle between the polarization angle. The polarizing properties can then be described by a complex 2 × 2 Jones matrix with linear base as , where subscripts show the linearly polarized output-input state, and four different complex coefficients represent the preserving or transformation abilities with orthogonal linearly polarization states. For arbitrary input and output linear polarization states, the output electric field can be expressed as:

|  | (S2) |
| --- | --- |

When scaling the number of polarization transformation channels to *n*, where each channel corresponds to a unique pair of input polarization combination and output polarization combination , the generalized polarization transformation equation can be represented as:

|  | (S3) |
| --- | --- |

This equation can be simplified as , where , *A* is a matrix, and . Coefficient matrix (*A*) dictates that the upper bound of independently tunable channels is , corresponding to the four complex parameters. Crucially, the input-output polarization pairs associated with these parameters are linearly independent within the coefficient matrix, as demonstrated by the non-vanishing determinant of the polarization coupling matrix.

**Note 2. Meta-atom with decoupled the** **physical symmetry**

Physical symmetric coupling exists in most polarization multiplexing works due to geometric configuration of the meta-atoms, and its essence is that the two cross-polarization channels are inherently coupled. To achieve independent control of all four Jones matrix parameters, we employ a chirality-assisted meta-atom previously developed by our previous workS1, S2, which enables parameter decoupling through twisting the relative rotation offset between different functional components and geometric dimension engineering. Such meta-structures have been widely studied for its famous circular dichroism performancesS3-S6. The structure schematic of the meta-atom is shown in Fig. S1. The functional elements are the rectangular patches with three parallel gaps that create the miniaturization condition for meta-atom sizes. The width and length of the rectangular patch is labelled as and , the gaps width and length are and , and the relative distance between adjacent gaps is . The five structural parameters collectively provide two degrees of freedom, enabling independent control over the amplitude and phase of three Jones matrix parameters in a single-layer metasurface. Three patch elements with same configuration and independent rotation angles , and are the key factor to break the construction symmetry and realize the control of all four Jones matrix parameters. As for sandwiched dielectric layer and metallic grid layer, we design a grid component with circle aperture insensitive for rotation, and the radius of circle aperture is . Inter four layers of dielectric substrate have same material parameters with relative permittivity and thickness . From the view of equivalent circuit model, this multilayered meta-atom can provide a band-pass non-resonant profile within the target bandwidth. Thereinto, three rectangular patches act as the capacitance elements, two grid layers are inductance elements, and four dielectric substrates are equivalent to transmission lines in such cascading network. Thus, the metaatom model can be regarded as a multi-order bandpass filter network. The specific explanations can be found in our previous work S1, S2.

The meta-atom with the periodic boundary conditions along the x- and y- direction is simulated at 10 GHz in the CST Microwave Studio. We use the linearly polarized plane wave as the incident wave while changing the specific parameters of the meta-atom. Through precise adjustment of structural spacing parameters and geometric rotation angles, we have achieved amplitude and phase separation across four Jones matrix parameters, exhibiting 2-bit amplitude control (4 discrete levels spanning from 0 to 1) and 3-bit phase control (8 discrete levels covering -180° to 180°). This yields approximately 110,000 unique meta-atom parameter combinations.

**Fig S1** Schematic of chiral meta-atom. Topological configuration of proposed meta-atom with periodicity. Structural parameters of rectangular patches govern amplitude in polarization channels. Rotation angles of rectangular patches control phase in polarization channels.

**Note 3. Model of polarization diffraction neural network**

In Fig. 2A, we define the incident linearly polarized plane polarized wave as the input layer, the engineered metasurface as the hidden layer, and the output electromagnetic field as the output layer, establishing a complete optical analog to artificial neural networks. In Fig. 2C, we demonstrate the working principles of preprocessing, forward and backward propagationS7 in a polarization diffraction neural network. The four independent components of the Jones matrix correspond to four distinct input-output orthogonal polarization state combinations, enabling parallel optical computing. The preprocessing methodology is presented in the main text, which includes the least squares and orthogonal separation. Therein, the forward propagation is described by:

|  | (S4) |
| --- | --- |

where the represents the Rayleigh-Sommerfeld diffraction operator for propagation distance *z*. is the transformation matrix of the metasurface unit at position . and represent input field and output field respectively.

To solve for the four Jones matrix components, we define a polarization-dependent loss function that quantifies the discrepancy between the target field distributions and the network-predicted output fields. The goal of training is to make the stable. To make the predicted fields consistent with the target, we use the root-mean-squared-error (RMSE) as the loss function, which is expressed as:

|  | (S5) |
| --- | --- |

where *N* is the number of discretized meshes in the output plane, is the output intensity of the network at the *n*-th discretized point in the output plane, and is the target normalize intensity at the *n*-th discretized point in the output plane. The gradient descent algorithm is employed to minimize this difference by updating the phase distribution, which is expressed as:

|  | (S6) |
| --- | --- |

where *i* represents the number of iterations, is the phase profile of hidden layer at coordinates.

**Note 4. Fully-connected polarization transformation architecture for maximizing channel utilization**

Existing polarization multiplexing techniques are fundamentally limited to *N* independent channels when using *N* predefined polarization states without introducing additional degrees of freedom, as they only support one-to-one mappings between fixed input and output states. This linear scaling severely restricts capacity in applications like holography and optical communications. We propose a fully-connected polarization multiplexing architecture that exploits all possible input-output combinations of *N* polarization states, enabling *N*² distinct channels. Fig. S2 illustrates the evolution of fully-connected polarization channels with varying numbers *N.*

**Fig. S2** Fully-connected polarization transformation with scalable states (1 to N).

**4.1 Validation of fully-connected polarization transformation for**

When the number of polarization states is limited to *N* = 1, the system degenerates to a single co-polarized transmission channel (e.g., x-pol→x-pol). For(e.g., orthogonal x- and y-polarizations), the input-output combinations form four distinct channels, governed by the four independent components of the Jones matrix:

|  | (S7) |
| --- | --- |

As derived in Eq. (S7), each polarization transformation channel is independently controlled by the four parameters of the Jones matrix, while their orthogonality can be readily achieved within the existing system framework. Furthermore, for arbitrary dual-polarization input-output combinations, the corresponding transmission characteristics can be theoretically solved using the Eq. (S3).

Considering non-orthogonal polarization-multiplexed holography using dual-polarization inputs (x-pol and 45°-pol), it generates four fully-connected polarization channels presented in Fig. S3:

|  | (S8) |
| --- | --- |

Although the x-pol and 45°-pol components are non-orthogonal (i.e., subject to polarization crosstalk), the coefficient matrix reveals that isolating crosstalk within interference-free channels enables channel independence. In other words, the coefficient matrix is full-rank, thus the polarization transformation equation admits a unique solution. Four polarization channels (x-x, x-45°, 45°-x, 45°-45°) generate output field , which encode holographic patterns A-D (Fig. S4), respectively. To maximize output fidelity, 60×60 aforementioned chiral meta-atoms are employed to construct the hidden layer (physical size: 600×600 mm²). The hidden layer is single-layered with an interlayer distance of 200 mm, while other polarization diffraction neural network (PDNN) parameters remain consistent. Training converged within 12 min (PDNN architecture and results shown in Fig. S4), and the calculation results successfully validate fully-connected polarization multiplexing network. As this does not represent a fundamental technical barrier, fabrication tests were omitted here.

**Fig. S3** (A) Schematic of dual-polarization fully-connected channels. Two non-orthogonal polarization states (x-pol and 45°-pol) to construct the fully-connected channel architecture. (B) Schematic of four-polarization-channel diffraction.


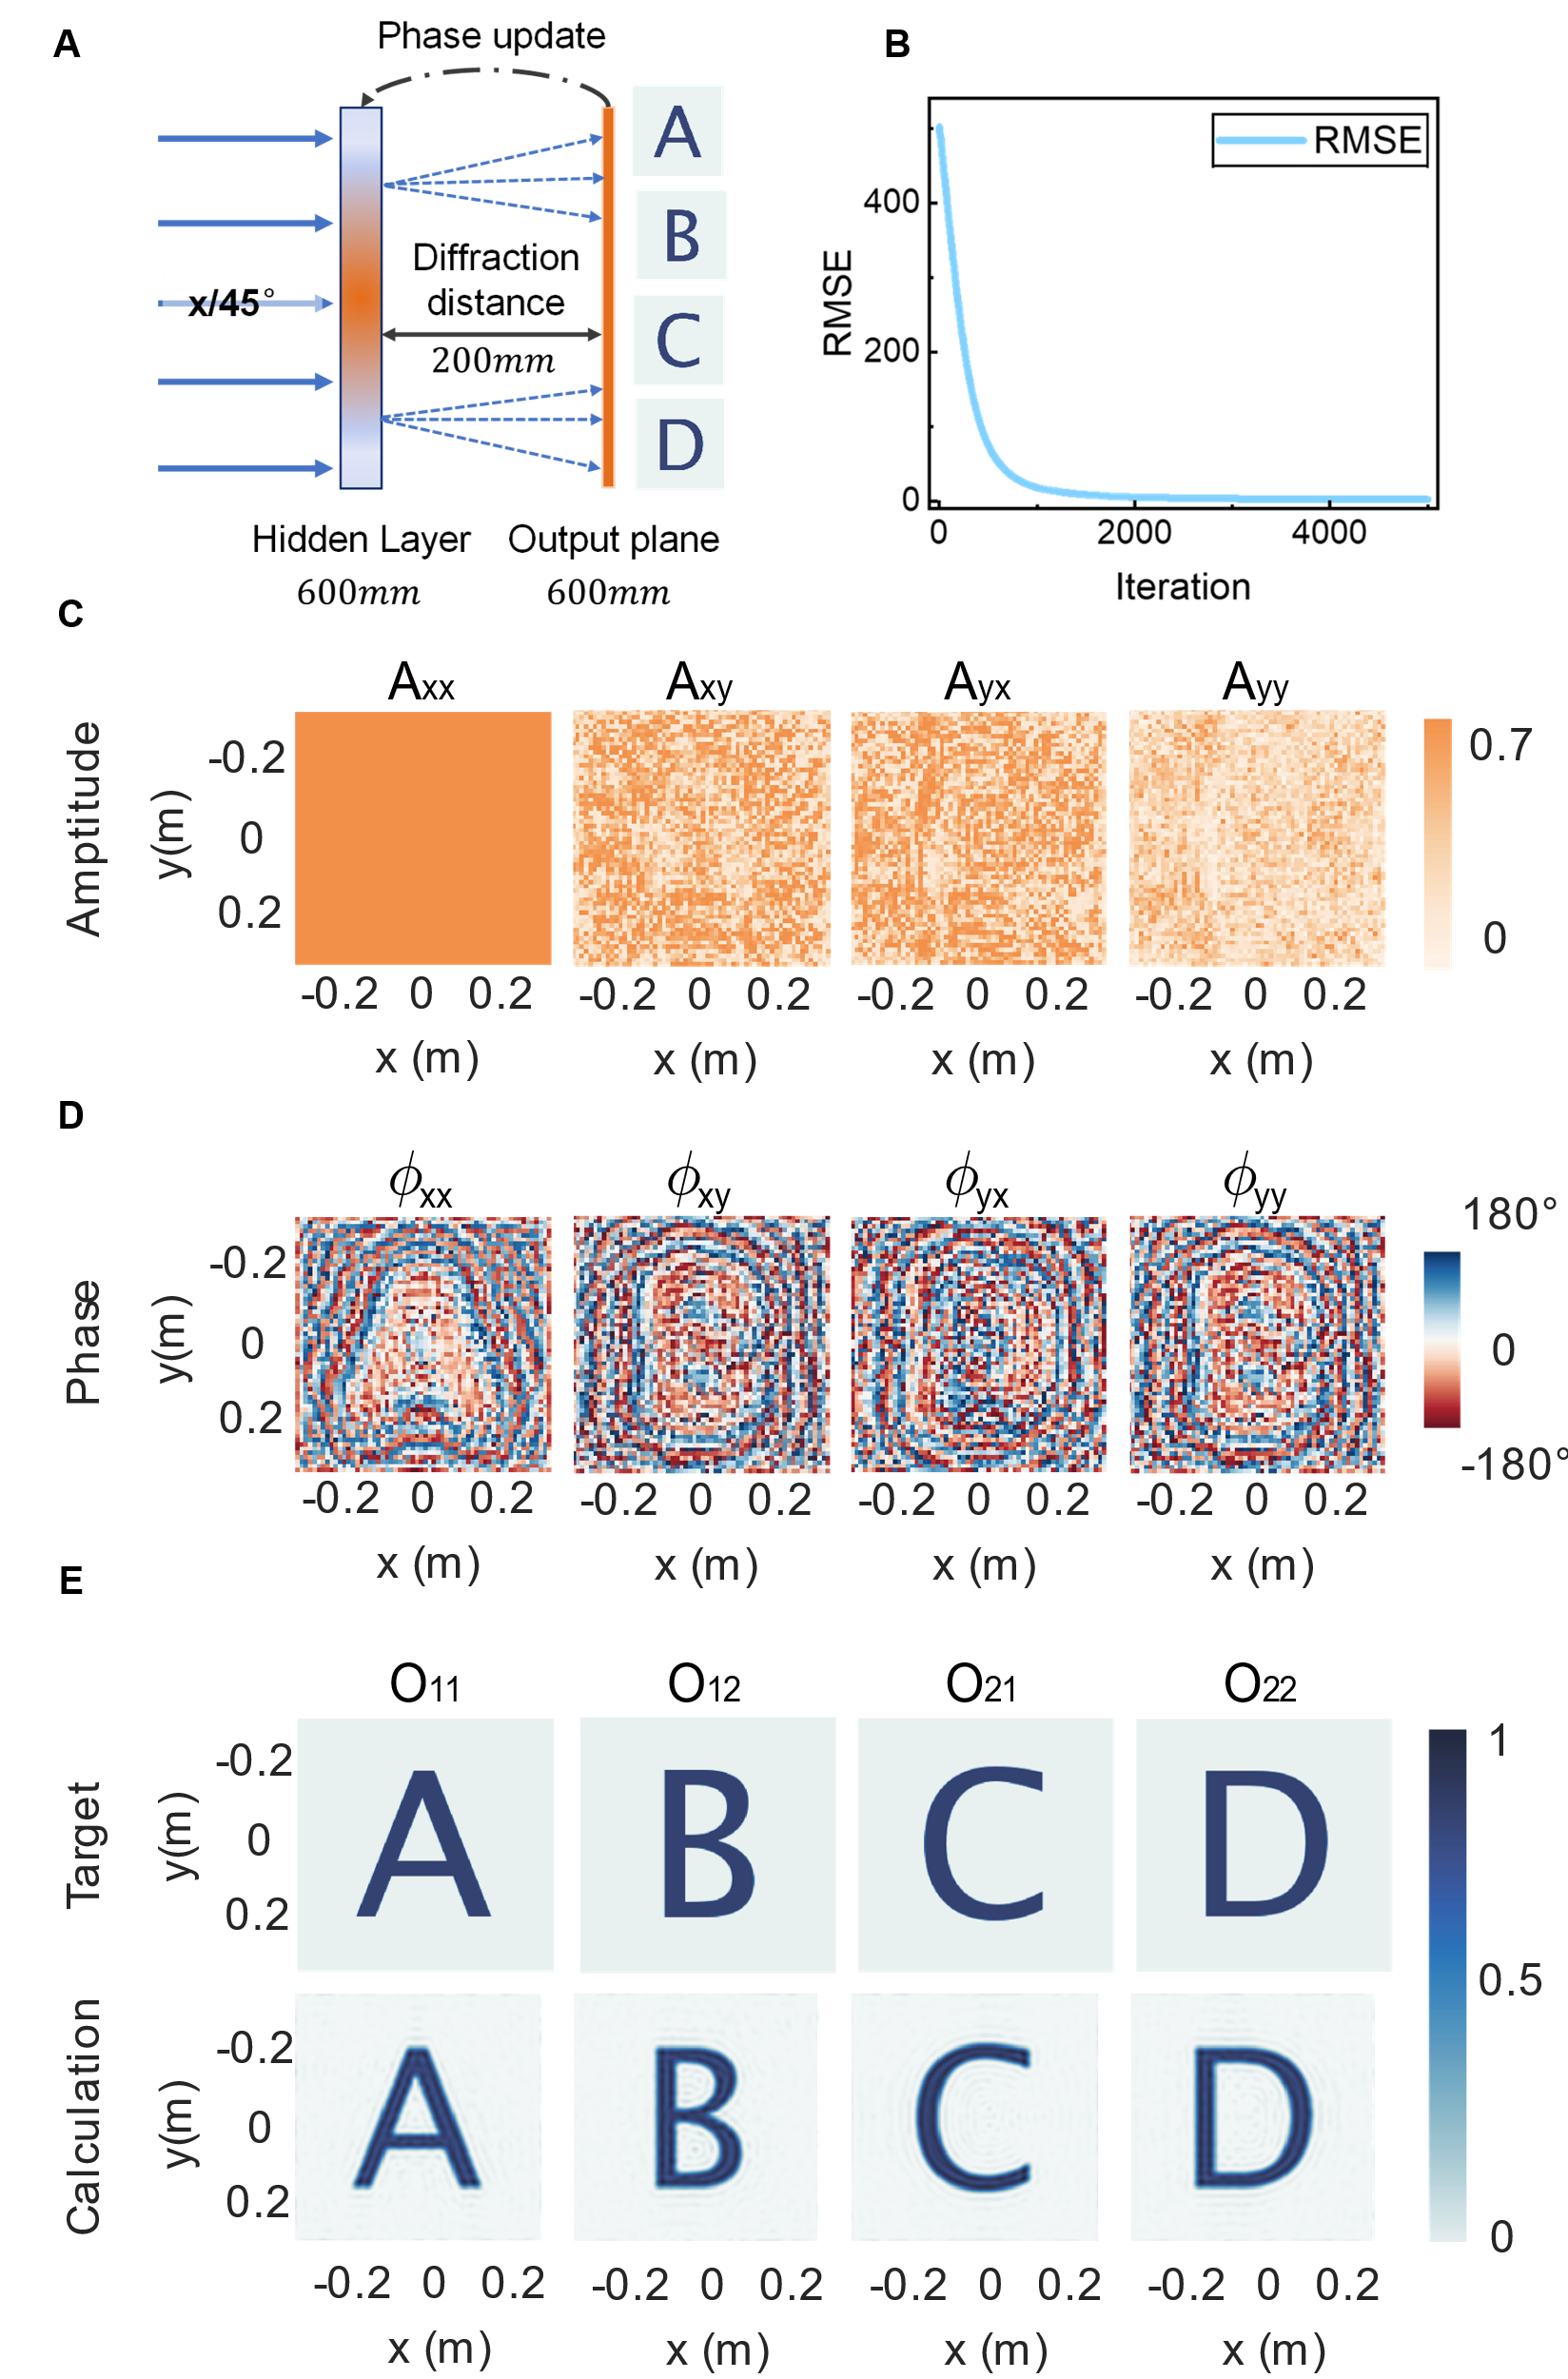


**Fig. S4** PDNN architecture and results (A) PDNN structural configuration. The single-layer PDNN employs a metasurface with 60×60 meta-atoms. (B) Training loss convergence. (C) Amplitude distribution of orthogonal channels. The x-x channel maintains a constant amplitude of 0.7 (normalized) due to its parameter independence in the polarization transformation equations. (D) Phase distribution of orthogonal channels (E) Comparison of target output and trained output.

**4.2 Limitations of polarization multiplexing for *N* > 2: demonstration with *N* = 3**

As derived in **Note 1**, polarization multiplexing without additional degrees of freedom (e.g., wavelength, OAM) is fundamentally limited to 4 independent channels due to the rank deficiency of the coefficient matrix. In this part, we proposed a diffraction neural network with three linear polarization states to verify the inherent coupling between non-orthogonal polarization channel when increasing the number of polarization states. The output plane is designated to generate a 3×3 regional distribution, corresponding to the x-x, x-y, x-45°, y-x, y-y, y-45°, 45°-x, 45°-y, and 45°-45° channels, which respectively achieve letter pattern imaging from 'a' to 'i' in Fig. S5A. The polarization transformation equation is formulated as follows:

|  | (S9) |
| --- | --- |

From the Eq. (S9), it is evident that the number of rows in the coefficient matrix exceeds the number of unknowns, indicating no exact solution exists. The four components can be independently derived from the four Jones matrix elements. Once these four components are determined, other polarization-converted fields can be obtained through polarization synthesis, as demonstrated in Fig. S5B.

From the polarization synthesis results, it can be observed that the synthesized channels represent a proportional combination of independent channels, and cannot generate the corresponding holographic letters.


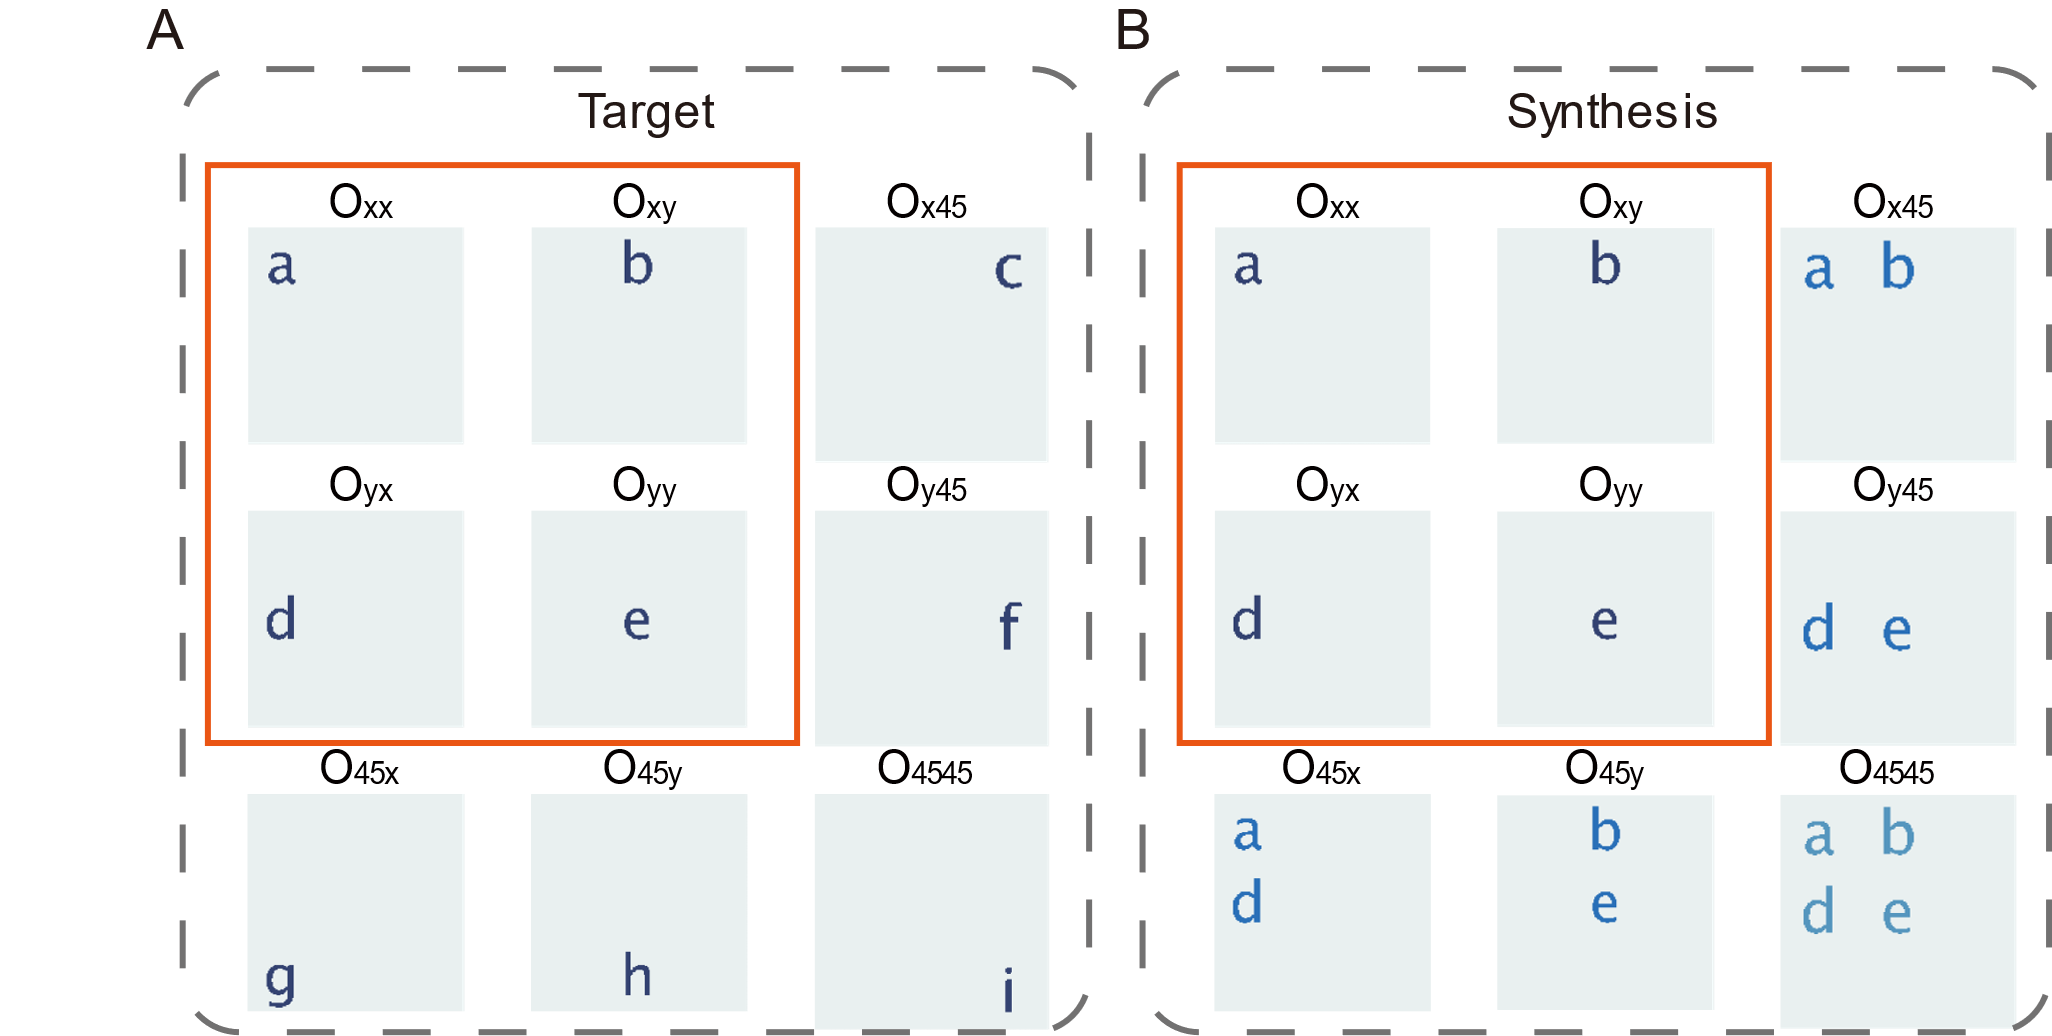


**Fig. S5** Demonstration of fully-connected polarization channels (x/y/45°) target and independently synthesized channel results. (A) Target generating lowercase letter images from 'a' to 'i' across 9 channels. (B) Resulting independently processed four-channel images are synthesized through polarization to produce the final image.

**4.3 Least-squares solution for overdetermined polarization transformation equations**

To achieve relative independence between channels, we employ the least-squares method for solving the overdetermined equation system S8. Analogous to linear regression, this approach approximates solutions with minimal error by optimally fitting the linear solution space, expressed as:

|  | (S10) |
| --- | --- |

where *A* is the 9×4 coefficient matrix (for *N* = 3), and *b* contains target field amplitudes. The mathematical representation in this polarization equation system is expressed as:

|  | (S11) |
| --- | --- |

The solution obtained via the least-squares method undergoes orthogonal decomposition, ultimately generating all four components . The results shown in Fig. S6 demonstrate that the least-squares solution enables the generation of distinct holographic letter patterns in the target region with superior amplitude performance. This breakthrough suggests a novel approach for expanding polarization-multiplexed channels. Further analysis through correlation coefficient matrices for each channel region provides quantitative visualization of inter-channel crosstalk effects.

With reference to the independent channel definitionS8, we set the minimum correlation coefficient threshold at 0.3. The analysis presented in Fig. S7 reveals that certain channels already exhibit independence, while all channels demonstrate relative independence under this criterion.

**Fig. S6** Demonstration of fully-connected polarization channels (x/y/45°) target and least-squares polarization synthesis results.

**Fig. S7** Correlation coefficient matrix of principal vs. crosstalk polarization channels.

**Note 5. Digital encryption details of the *N*=3 fully-connected polarization architecture**

To validate the preprocessing of minimal inherent polarization couplings for fully-connected polarization channels multiplexing, we select three polarization states with uniform angular spacing (0°, 60°, 120°) to construct polarization transformation channels. These correspond to nine multiplexed channels include x-x, x-60°, x-120°, 60°-x, 60°-60°, 60°-120°, 120°-x, 120°-60°, and 120°-120°. We employ relatively complex digital encryption transmission as the application method, assigning each channel a cryptographic key and digits 1-8 through regional partitioning. While it is feasible to generate the outputs across all channels throughout the entire diffraction plane, regional outputs allow for direct visualization of the relationship between the primary polarization and crosstalk in channel multiplexing. The keys are randomly designed binary encoding, which can be dynamically updated to ensure encryption/decryption security. The Fig. S8B below illustrates the overall target field design.

Fig. S8A illustrates the encryption/decryption process, where a randomly generated key serves as the digital transformation tool in the x-x channel. All channels feature a 150×150 pixels distribution, with each regional channel occupying a 50×50 pixels area. Both encryption and decryption employ logical operations: the key and digits are converted to binary format and processed via XOR operations in the encryption system. The eight digit-channels undergo encryption to generate the pattern shown in Fig. S8C. This represents target field preprocessing, where the *N* = 3 fully-connected polarization transformation orthogonal field separation method is applied. Through least-squares optimization, a polarization-synthesized output field is generated (Fig. S8D). Here, all nine channels utilize the orthogonal solutions derived from least-squares as basis vectors, while the key undergoes simultaneous transformation.

Each of the eight channels then performs XOR operations again with Channel-1's key, ultimately recovering the digital information displayed in Fig. S1E. Results demonstrate sufficiently recovery of most pixel points, successful reconstructing the corresponding digit features. Higher pixel counts correlate with improved reconstruction fidelity. This process validates the effectiveness of our fully-connected polarization transformation method, significantly expanding multiplexing capability. The complexity of polarization channels and the randomness of keys ensure the security of encryption.

**Fig. S8** *N*=3 fully-connected polarization channel digital encryption workflow: technical demonstration. (A) Encryption/Decryption process. (B) Channel-specific target field design. (C) Post-encryption target fields (D) Least-Squares optimized output. (E) Decryption output.

**Note 6. Inherent polarization coupling analysis for *N* = 3 fully-connected polarization channels with varied angular distributions**

When the number of polarization states reaches and over 3, the above analysis shows that the corresponding target cannot be obtained through synthesis of independent orthogonal components, but the optimal orthogonal components can be calculated using the least squares method. Correspondingly, especially for linear polarization, different polarization angle distributions result in varying impacts on the calculated crosstalk polarization channels. Here, the output plane is divided into a 9×9 grid, with each 3×3 sub-region corresponding to one polarization channel. This approach allows for more intuitive observation of the distribution and influence of the main polarization and crosstalk polarization

We calculated the PDNN results with uniform polarization angle interval (0°, 60°, 120°) as well as three non-uniform intervals (0°, 45°, 90°), (0°, 20°, 120°) and (0°, 60°, 100°). The corresponding normalized intensity distributions and crosstalk ratios are computed, as shown in Fig. S9. The top three crosstalk values are summarized in Table S1. It can be observed that, regardless of the interval characteristics, small polarization angle intervals lead to high inherent polarization coupling. This aligns with practical observations. For example, the vector distributions of x- and 20° or x- and 45° become increasingly similar as the polarization angle interval decreases.

Here, we compare the correlation coefficient matrices for the four polarization angle distributions. Fig. S10 confirms the above conclusion. Taking 0.3 as the threshold for independent channel coefficients, the analysis shows that under small polarization angle intervals, the correlation coefficients of adjacent channels significantly affect the independence of the main polarization channel. For linear polarization with *N* = 3, uniform polarization interval angle of 60° (i.e. 0°, 60°, 120°) achieves the maximum polarization separation. The correlation coefficient matrix demonstrates that all main polarization channels remain independent under this configuration.

**Fig. S9** Target output field and calculated output fields for uniform and non-uniform varied polarization angle distributions. (A) target (B) x, 60°, 120° (C) x, 45°, y (D) x, 20°, 120°(E) x, 60°, 100°.

Table S1. Normalized crosstalk intensity ratio for uniform and non-uniform polarization angle distributions

| Polarization angle distributions | First-order crosstalk intensity ratio | Second-order crosstalk intensity ratio | Third-order crosstalk intensity ratio |
| --- | --- | --- | --- |
| x, 60°, 120° | 0.25 | 0.0625 | null |
| x, 45°, y | 0.5 | 0.25 | 0.222 |
| x, 20°, 120° | 0.9677 | 0.9365 | 0.6158 |
| x, 60°, 100° | 0.5376 | 0.3803 | 0.2962 |

**Fig. S10** Correlation coefficient matrices for varied polarization angle distributions.

**Note 7. Fabrication and measurement methods in microwave region.**

**7.1 Microwave fabrication of metasurface samples.**

The prototypes proposed in this paper are fabricated by classic printed circuit board (PCB) technique. In the fabrication process, meta-structures are implemented with four pieces of polyfluortetraethylene dielectric-slabs and three adhesive layers. The 1mm-thick dielectric substrates have a relative permittivity and double copper-cladding layer of 0.035mm-thick, while the adhesive layer has a relative permittivity and thickness of 0.1mm. The total thickness of fabricated samples is 4.475 mm (about at 10 GHz). The sample for verifying uniform fully-connected linear polarization regional holography is fabricated with 40 × 40 meta-atoms, and the photographs of sample are shown in Fig. S11. Meanwhile, metasurface for fully-connected linear polarization channel recognition consists of 30 × 30 meta-atoms, and the fabrication tolerance is in accordance with initial design requirements, whose photograph is reprehensively shown in Fig. 4D in main text.


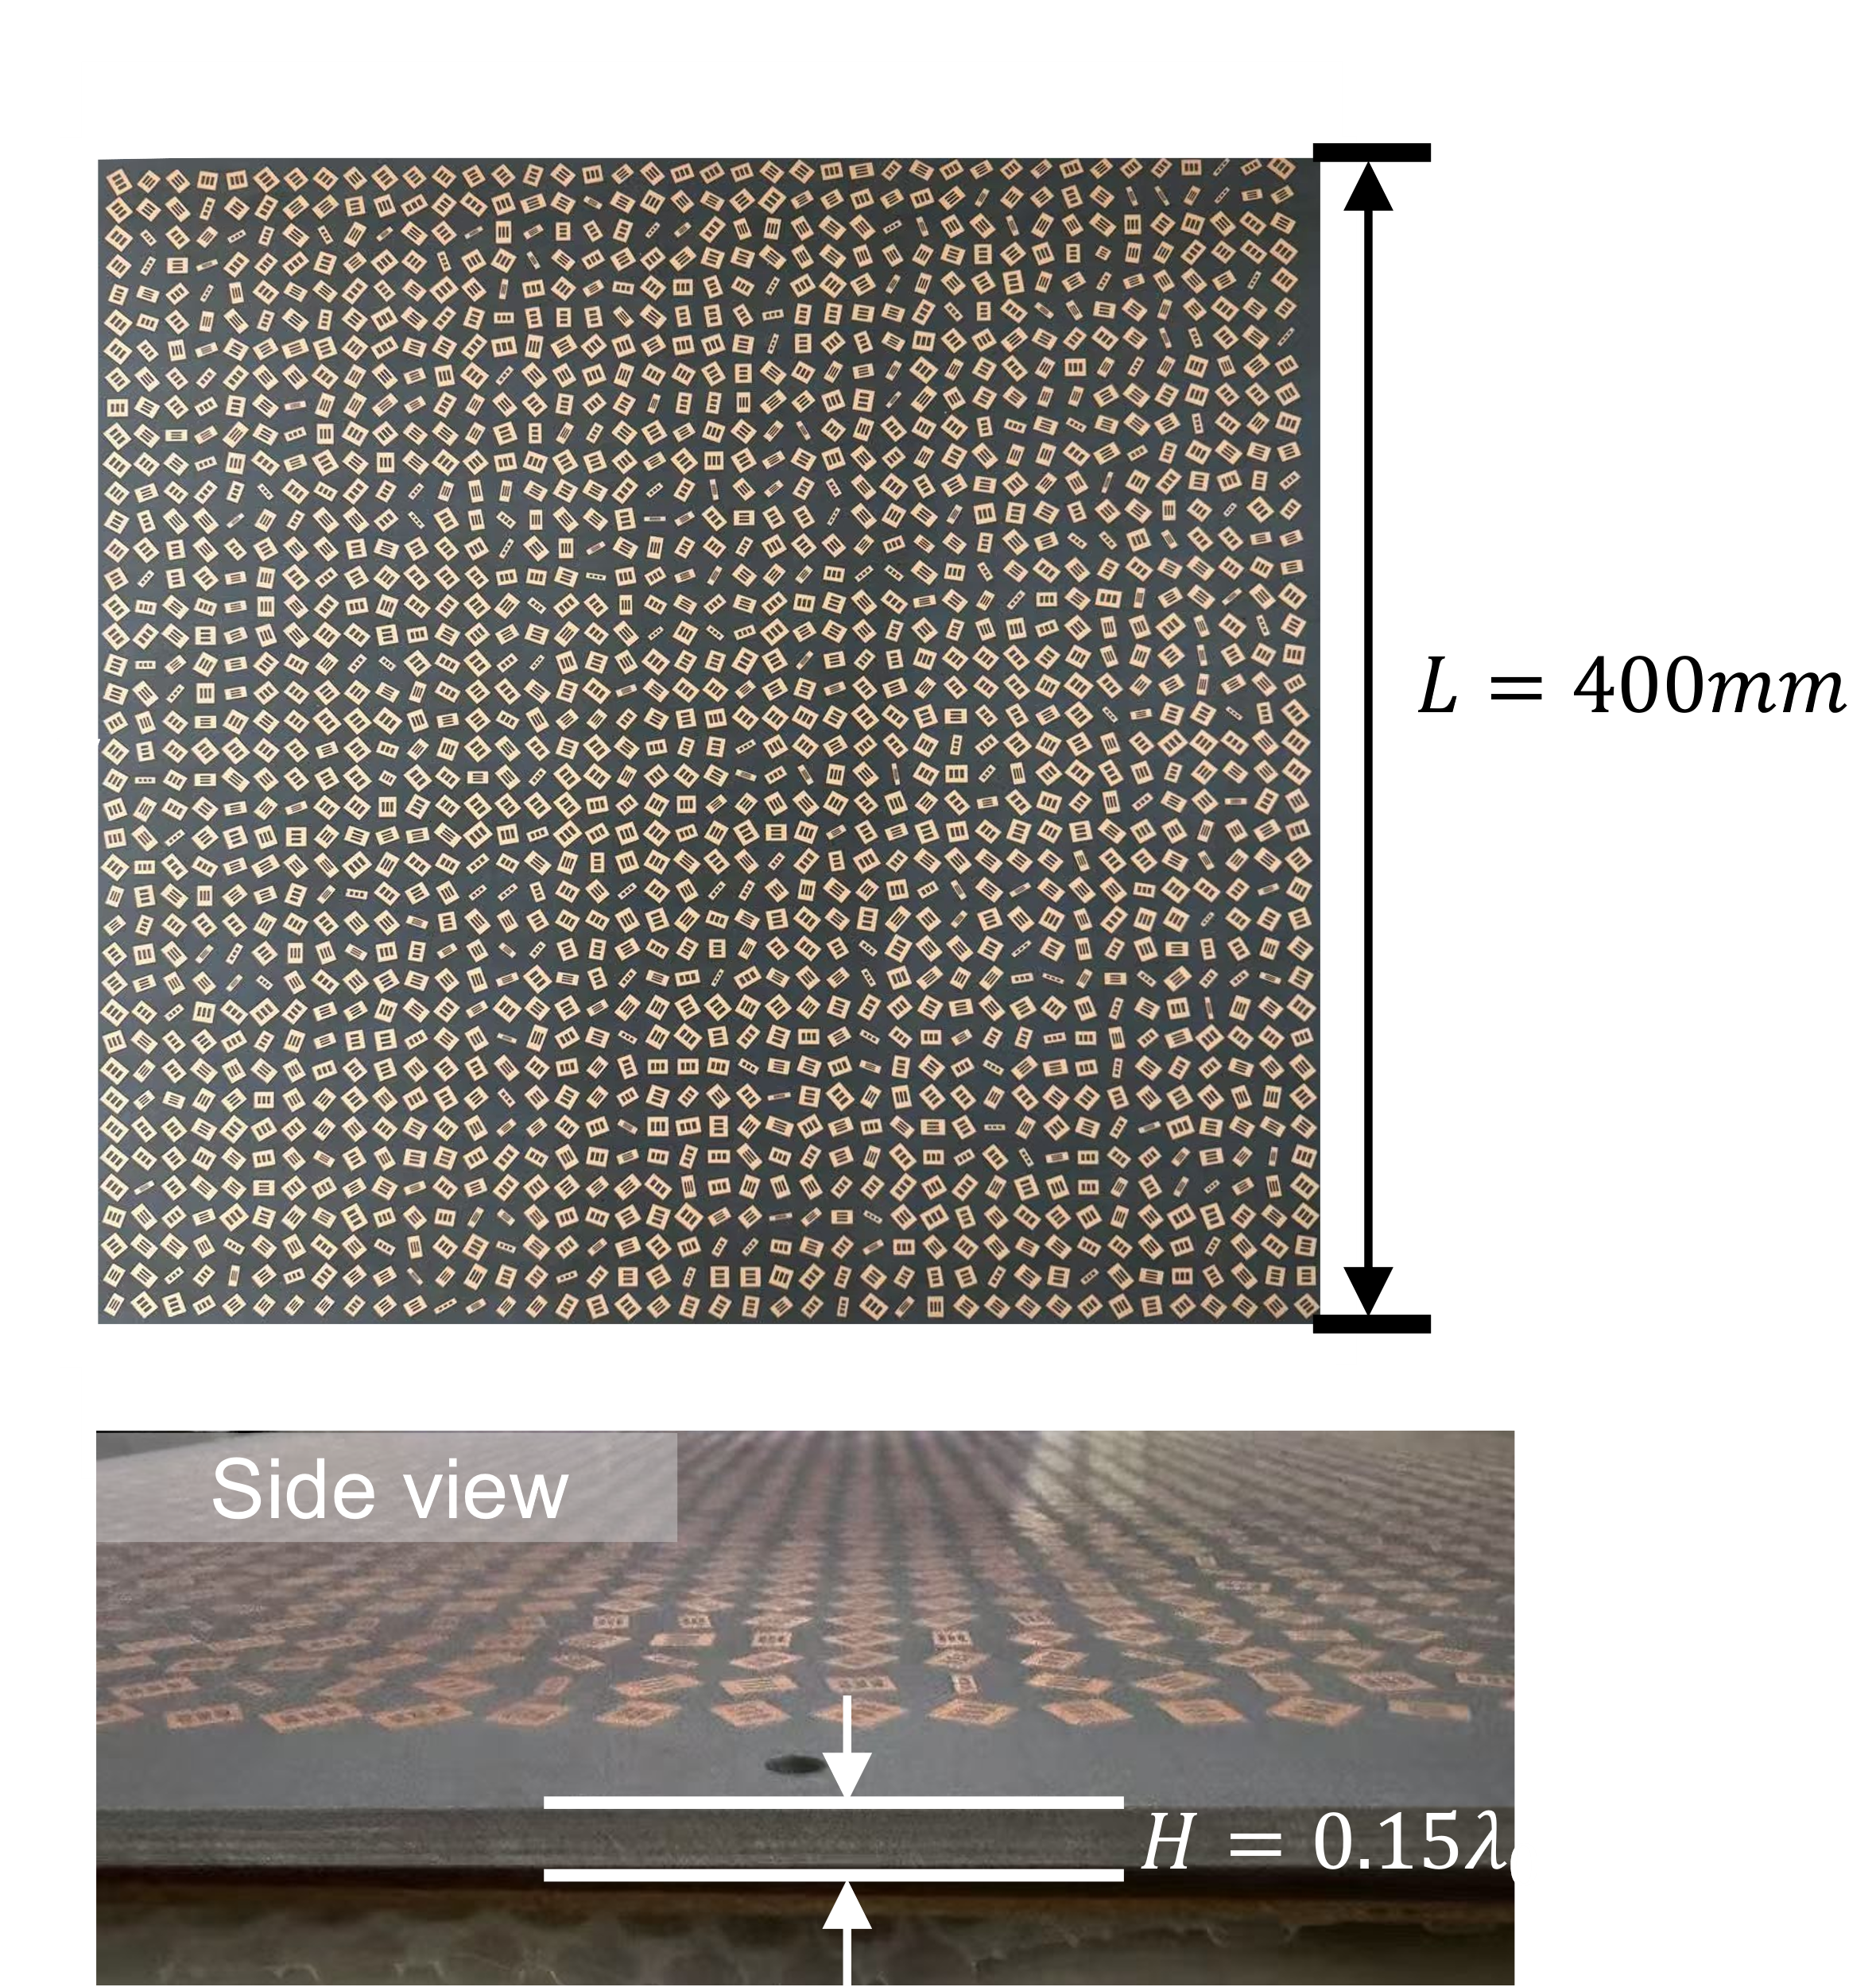


**Fig. S11** Photograph of fabricated metasurface sample for verifying uniform fully-connected linear polarization regional holography.

**7.2 Experimental measurements.**

Both works employed near-field detection. Near-field detection is conducted by a setup surrounded by microwave absorbers in anechoic chamber. The schematic is illustrated in Fig. S12. The Agilent 8722ES (V.N.A.) is used to record the complex transmission field information (*S*21 parameters), including both amplitude and phase responses of each polarization component. A 2 GHz-18 GHz dual linear polarized wideband horn antenna is used as the feeding source to launch the quasi-plane waves by enlarging the distance relative to metasurface more than . For the near-field mapping detection, a fiber optic active antenna is used as a field probe to measure both the amplitude and phase of the electric field. This fiber probe has an ultrasmall purely dielectric head of 6.6 × 6.6 mm2, owning portability and movable abilities, and negligible field perturbation (details in http://www.enprobe.de/datasheets/EFS-105.pdf). The probe receiver is fixed on two translation stages controlled by a motion controller and its position is incremented by a step of 2 mm. Thus, the probe receiver engineered by motion controller can be used to collect the output electric field information covering the whole detection *xoy* plane with specific propagation z distance. Notably, the receiver fiber probe can be conducted along horizontal and vertical directions to collect *x*- and *y*-linearly polarized fields, i.e., and components. Transmission electric fields for other linear polarizations is obtained by polarization synthesis. Through combining different orthogonal polarizations of source antenna, arbitrary predefined input/output field distributions can be derived from the polarization transformation matrix equations, ultimately generating intensity profiles for all polarization transformation channel.

**Fig. S12** Schematic of experimental setups for near-field detection measurement.

**Note 8. Supplement analyses and results of non-uniform fully-connected linear polarization regional holography**

**8.1 Polarization equation formulation**

Here, referencing the inherent coupling analysis for different polarization angle distributions in Note 6, we selected the 0°, 60°, and 120° polarization states with minimal polarization couplings for 9 channels simplified digital holographic imaging application design. Eq. S3 is correspondingly transformed as:

|  | (S12) |
| --- | --- |

**8.2 PDNN configuration and training details**

Prior to PDNN implementation, the polarization transformation equation system undergoes non-orthogonal decomposition to obtain least-squares orthogonal solutions. The input and hidden layers of the polarization-diffractive neural network feature a 40 × 40 pixels distribution with physical dimensions of 400mm×400mm. The output layer is divided into 3 × 3 regions, each containing a simplified 14 × 14 digital pattern, collectively forming a 42 × 42 overall pixel distribution measuring 420mm × 420mm. The interlayer distance is fixed at 100 mm to ensure sufficient near-field diffraction for phase-to-intensity conversion. The complete schematic is illustrated in Fig S13. The corresponding results have been presented in Fig 3B. Original configuration is maintained with a learning rate of 0.001 to ensure imaging precision, running for 2000 epochs with total training time of 1 min.

**Fig. S13** PDNN architecture and diffractive configuration schematic.

**8.3 Metrics calculation and technical details**

The amplitudes of the hidden layer metasurface, resulting from non-orthogonal optimization, are mapped in Fig S14. The diffraction efficiencies for the four orthogonal components are calculated as 18.4%, 18.1%, 18.2%, and 23.1% respectively. Correspondingly, the regional transformation efficiencies for each fully-connected polarization channel are 8.18%, 8.52%, 7.64%, 8.71%, 12.45%, 7.96%, 7.55%, 8.68% and 8.13%. The measured transformation holographic efficiencies are 7.33%, 4.16%, 5.93%, 7.84%, 8.02%, 7.31%, 4.96%, 8.24% and 9.18%. The transformation efficiency of each channel is determined not only by the polarization transformation coefficient matrix, but also by the channel design complexity. Here we focus on the transformation efficiency of the primary polarization channels. Considering the presence of crosstalk components in the output, this calculation excludes their intensity impact and specifically compares the energy from the primary polarization channels with the incident intensity.

Meanwhile, we confirm that in the nine-channel correlation coefficient matrix calculation, compared to previous analyses, some crosstalk channels exhibit correlation coefficients exceeding 0.3 (though all remain below 0.4) due to the complexity of holographic imaging and design considerations. These channels still maintain relative independence. The calculation methods for the relevant metrics have been specified in the main text.


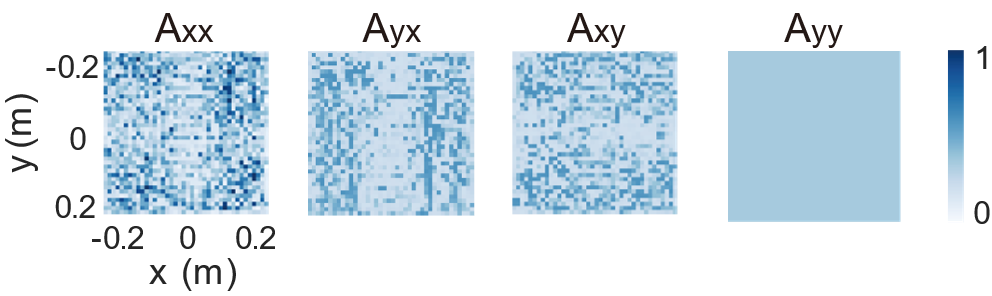


**Fig. S14** Unit amplitude distribution of four orthogonal channels.

**Fig. S15** Correlation coefficient matrix of calculated results.

**Note 9. Supplement analyses and results of amplitude-feature enhancement for fully-connected multiplexing network with non-uniformly sampled linear polarizations**

**9.1 Polarization equation formulation**

As demonstrated in **Note 6**, the transition from uniform to non-uniform polarization angle intervals impacts channel independence. Here, we reduce polarization angle intervals to achieve non-uniform polarization multiplexing with three polarization states (x, 45°, y), corresponding to nine fully-connected polarization channels (x-x, y-x, 45°-x, x-y, y-y, 45°-y, x-45°, y-45°, 45°-45°). The polarization transformation Eq. S3 is transformed as follows:

|  | (S13) |
| --- | --- |

**9.2 Impact on regional transformation efficiency of polarization angle interval transition from uniform to non-uniform**

In **Note 6**, we analyzed the calculations and crosstalk effects of different polarization angle combinations. First, it should be noted that, in order to activate all polarization channels, the orthogonally polarized channels of each unit must satisfy the law of conservation of energy. Specifically, the theoretical maximum value of the amplitude for each channel within a unit is 0.7, and the theoretical normalized energy magnitude is 0.5. When the minimum angular spacing decreases from 60° to 45°, the maximum crosstalk increases by approximately two times. Taking the energy of the main channel as 1, the theoretical total crosstalk energies of each channel calculated by the least squares are 5/4 and 2 respectively. To separate the polarization coupling energy for each polarization channel, additional scaling factors of 4/9 and 1/4 need to be applied respectively. Consequently, the theoretical regional transformation efficiencies are 22.2% and 12.5% respectively.

However, due to the non-orthogonality limitation among polarization channels, the amplitudes will exhibit corresponding characteristic distributions during the orthogonal decomposition process because of the inherent polarization crosstalk. For uniform and nonuniform spacing intervals under ideal conditions, the calculated mean amplitudes per unit are approximately 0.47 and 0.42, which can be approximated to achieve 22.1% and 17.6% energy diffraction, respectively. Consequently, actual regional transformation efficiencies of the designed metasurface are 9.8% and 4.5% respectively.

However, the design conditions are always non-ideal. Due to errors in amplitude and phase from unit cell response during the metasurface formation process, we conduct separate simulation calculations for both polarization angle intervals. The final regional diffraction efficiencies and signal-to-noise ratio (SNR) for each channel are shown in Fig S16. The calculation methods for the relevant metrics have been specified in the main text.

The results demonstrate that when reducing the minimum polarization angle interval from 60° to 45°, the regional diffraction efficiency decreases by half on average, while the SNR correspondingly doubles. Since the SNR originates from the error term in the solution of the polarization transformation equation system, it cannot achieve substantial improvement without introducing additional degrees of freedom. Meanwhile, the regional diffraction efficiency is determined by factors including the unit amplitude distribution and regional target design specifications.


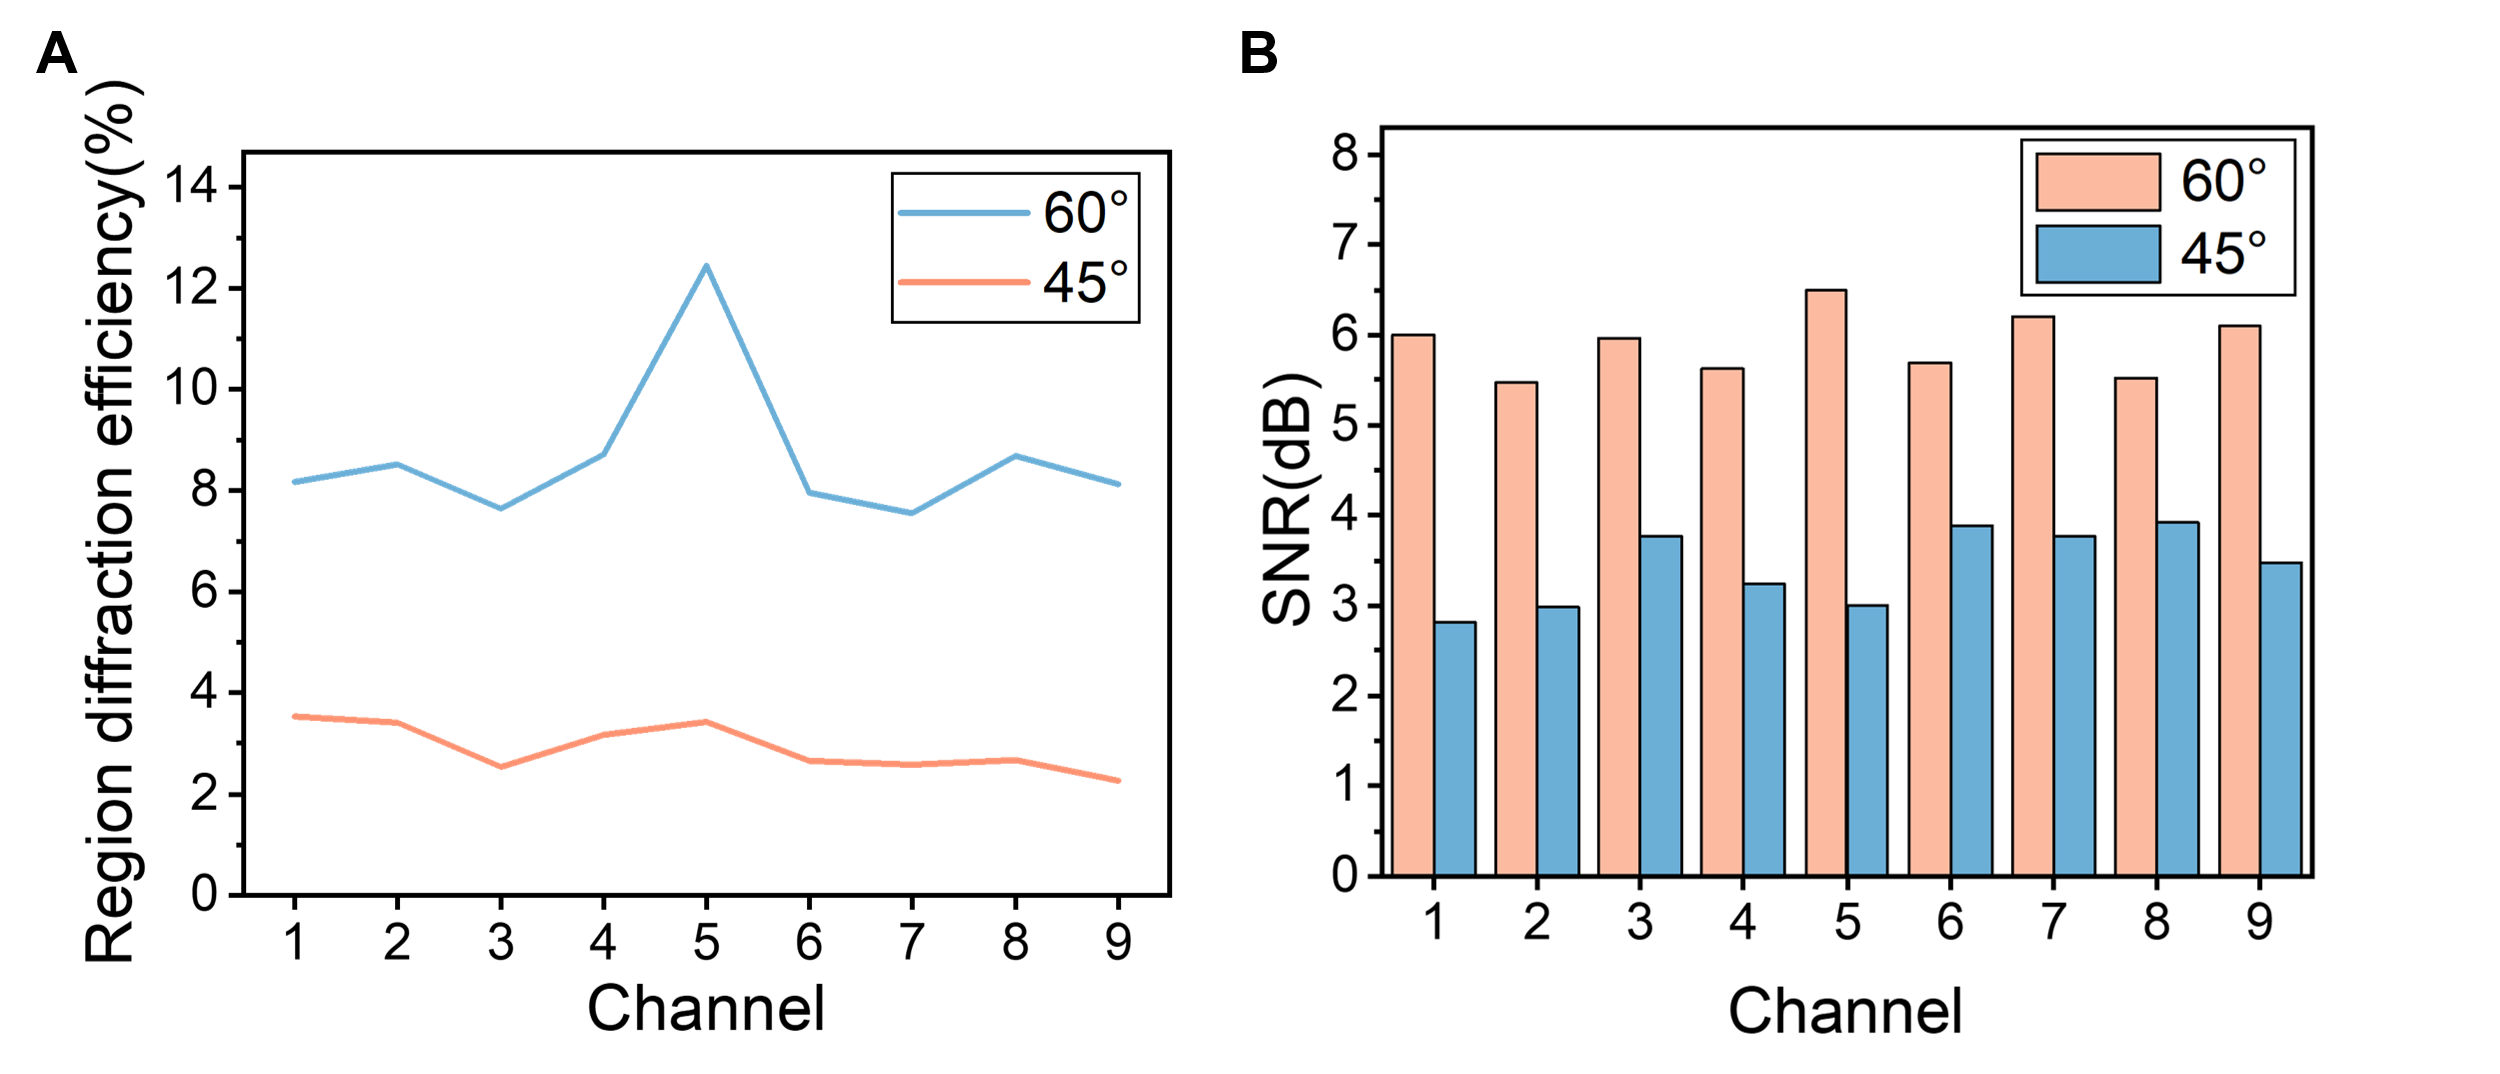


**Fig. S16** Regional transformation efficiencies and SNR of calculated results with reduced polarization angle interval from 60° to 45°.

**9.3 Introducing amplitude-feature enhancement of metasurface to enhance efficiency**

As evidenced by the regional diffraction efficiency in Fig. S16A, the current design achieves minimal crosstalk through full polarization connectivity, at the cost of low transformation efficiency (mean unit amplitude = 0.42). This is particularly undesirable for polarization channel identification (focusing) applications.

To enhance efficiency, we introduce an amplitude compression method that extracts the amplitude distribution feature of orthogonal polarization channels during the solving process, compressing the original 0-1 range into a 0.6-0.8 distribution. The focusing-point nature of channel identification inherently provides design stability. Notably, since the total energy per polarization state is normalized to 1, the four orthogonal channels must collectively satisfy amplitude constraint. Here we systematically compare the regional diffraction efficiency and SNR before and after amplitude optimization. The result of regional transformation efficiencies is shown in Fig. 4C.

The computational results demonstrate that after amplitude-feature enhancement, the regional transformation efficiencies improves by 3× to 8×, while the channel SNR remains consistent with pre-enhancement levels, thereby validating the feasibility of our approach.

It should be emphasized that polarization channel discrimination primarily concerns the energy concentration ratio at focal spots, which fundamentally differs from conventional holographic imaging. Herein, we extend our methodology to validate the fully-connected polarization channels (0°, 60°, 120°) in digital holography, with quantitative comparisons shown in Fig. S19. The post-modulation output fields clearly demonstrate the amplitude variation's impact on polarization channel crosstalk, with significant alterations observed in both PSNR and correlation coefficient matrices. For imaging applications, particular attention should be paid to reconstruction fidelity and channel isolation performance.

**Fig. S17** Schematic of amplitude variation.

**Fig. S18** SNR of calculated results with amplitude-feature enhancement.

**Fig. S19** Results after amplitude-feature enhancement. (A) Comparison of output field distributions. (B) PSNR values. (C) correlation coefficient matrices.

**9.4 PDNN configuration and results summary**

Prior to PDNN implementation, the polarization transformation equation system undergoes non-orthogonal decomposition to obtain least-squares orthogonal solutions. The input and hidden layers of the polarization-diffractive neural network feature a 30×30 pixels distribution with physical dimensions of 300 mm × 300 mm. The output layer is divided into 3×3 regions, each containing a simplified 3×3 digital pattern, collectively forming a 9×9 overall pixel distribution measuring 360 mm × 360 mm. The complete schematic is illustrated in Fig. S20. The corresponding results have been presented in Fig. 3B. Original configuration is maintained with a learning rate of 0.001 to ensure configuration precision, running for 2000 epochs with total training time of 30s. As shown in Fig. S21, both the loss and phase distribution results of PDNN demonstrate rapid convergence due to the simplicity of the target pattern.

**Fig. S20** PDNN architecture and diffractive configuration schematic.

**Fig. S21** PDNN results. (A) Loss. (B) Phase distribution.

**9.5 Investigating the impact of nonlinear noise on crosstalk reduction**

Inspired by theory of breaking polarization channel limits via nonlinear noise injectionS8 , where *r* indicates the amplitude of the random noise, and *I* is the identity matrix. We adapt this approach—not to achieve ultimate performance bounds, but to disrupt strict polarization synthesis relationships in Jones matrix solutions. By introducing controlled nonlinear noise, we reduce overall correlations (including the primary polarization channel), thereby enhancing inter-channel independence. Eq. S3 can be transformed into:

|  | (S14) |
| --- | --- |

We systematically investigate the impact of nonlinear noise with varying *r* (range: 0-1) on polarization channel independence, as quantitatively characterized in Fig. S22. As shown, increasing the noise amplitude enhances channel independence, albeit at the cost of reduced correlation in the primary polarization channel. Here, we employ as an optimal trade-off, which provides sufficient channel isolation while maintaining overall efficiency and SNR.

**Fig. S22** Calculated correlation matrices when varying *r* from 0 to 1.

**Note 10. Verification of *N* = 4 fully-connected polarization multiplexing with uniformly sampled linear polarizations**

Herein, we extend our fully-connected polarization multiplexing framework from originally developed for *N* = 3 to *N* = 4, thereby validating the feasibility of the proposed method in a higher-order configuration. We select the 0°, 45°, 90° and 135° polarization states with minimal polarization couplings for a 16-channel recognition.

Considering the resolution limitations in the microwave band, regional focusing is exemplified. In the PDNN framework, the output plane is configured as 12 × 12 pixels, with a single-pixel size of 30 mm × 30 mm, and the diffraction plane spans 360 mm × 360 mm. The diffraction distance is optimized to 200 mm to achieve complete diffraction patterns. Other parameters remain consistent with the *N* = 3 channel identification setup. Design objectives and calculation results are illustrated in Fig. S23. Additionally, a correlation coefficient matrix is computed. As illustrated in Fig. S24, primary channels exhibit high independence under predefined settings.

However, increasing *N* amplifies crosstalk effects, which are inherently tied to inherent polarization coupling. Under the linear polarization basis, the 16 polarization-transformation channels for *N* = 4 demonstrate significant channel isolation without additional degrees of freedom. To enable higher-dimensional polarization multiplexing, elliptical polarization or other degrees of freedom (e.g., wavelength and orbital angular momentum) must be introduced.


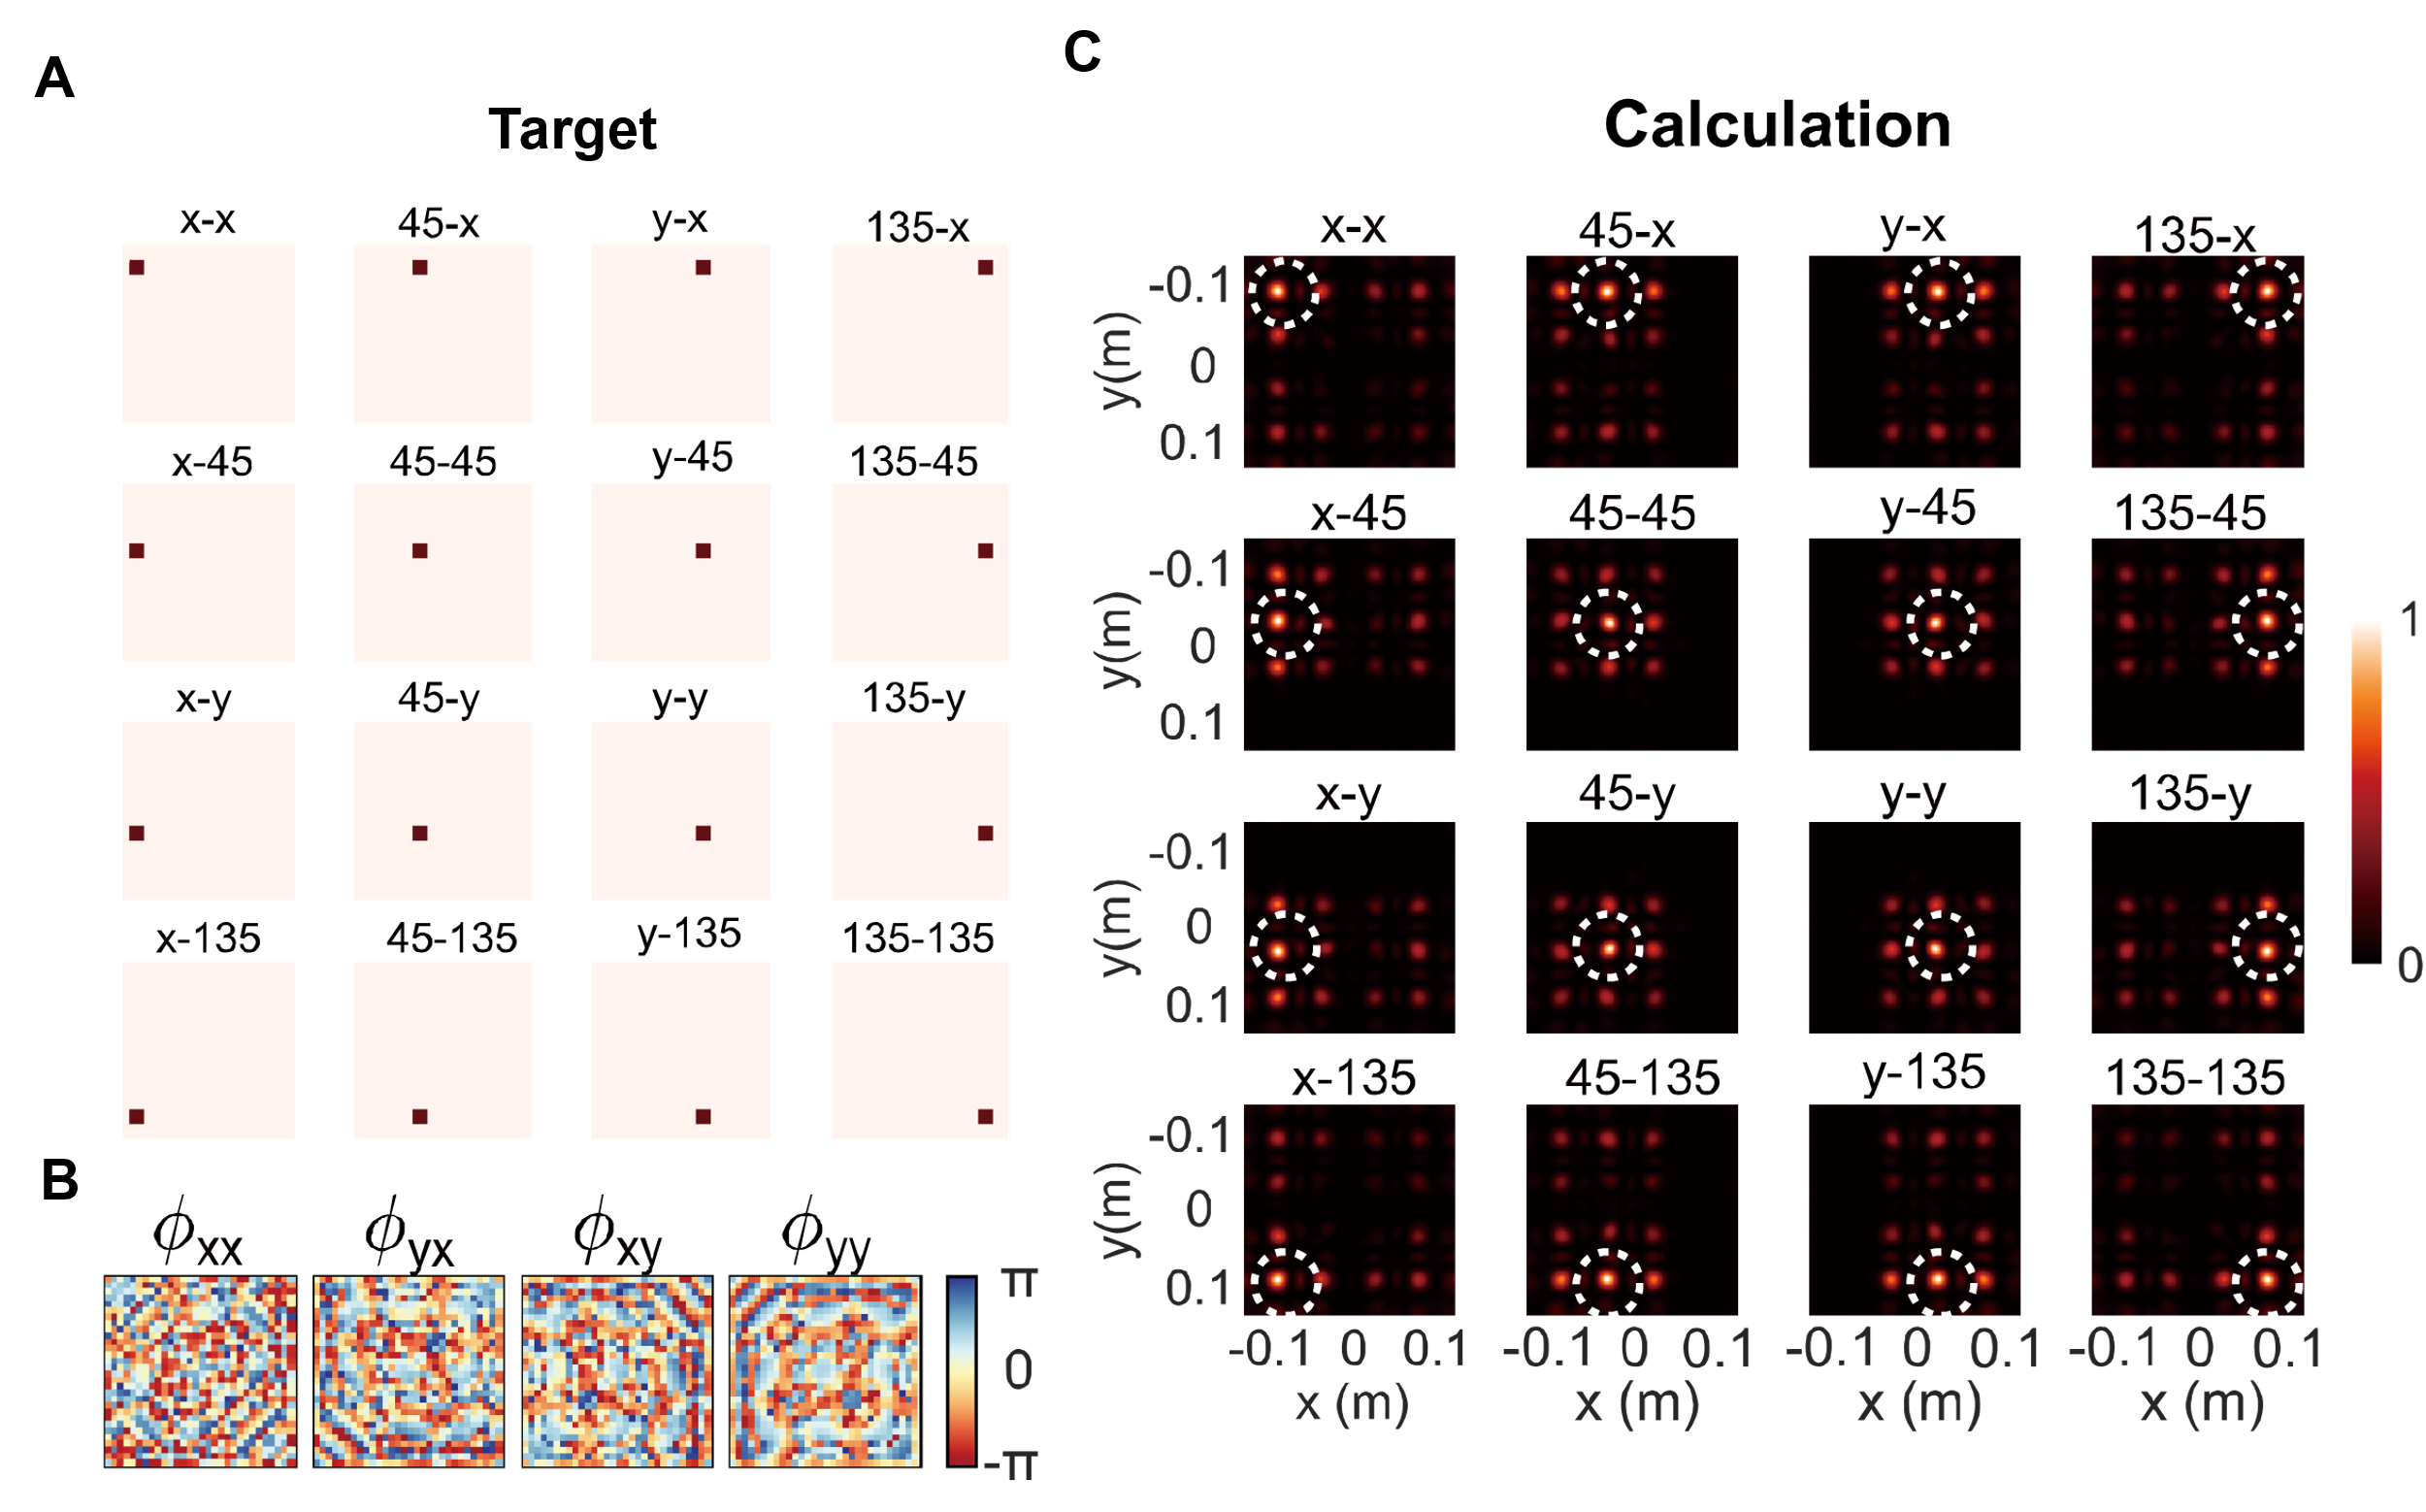


**Fig. S23** Results of *N* = 4 fully-connected polarization multiplexing. (A) Target (B) Phase distribution of orthogonal channels (C) Calculation.

**Fig. S24** Correlation coefficient matrix of calculated results.

**References**

1. Y. Yuan *et al*., Independent phase modulation for quadruplex polarization channels enabled by chirality-assisted geometric-phase metasurfaces. *Nature Communications* **11**, 4186 (2020).
2. Y. Yuan *et al*., Reaching the efficiency limit of arbitrary polarization transformation with non-orthogonal metasurfaces. *Nature Communications* **15**, 6682 (2024).
3. Y. Zhao, M. A. Belkin, A. Alù, Twisted optical metamaterials for planarized ultrathin broadbandcircular polarizers. *Nature Communications* **3**, 870 (2012).
4. Y. Zhao *et al.*, Chirality detection of enantiomers using twisted optical metamaterials. *Nature Communications* **8**, 14180 (2017).
5. N. Liu, H. Liu, S. Zhu, H. Giessen, Stereometamaterials. *Nature Photonics* **3**, 157-162 (2009).
6. M. Decker et al., Strong optical activity from twisted-cross photonic metamaterials. *Optics Letters* **34**, 2501-2503 (2009)
7. Chen H, Lou S, Wang Q, Huang P, Hu Y. Diffractive deep neural networks: Theories, optimization, and applications. *Appl Phys Rev* **11**, 0211332 (2024).
8. B. Xiong *et al.*, Breaking the limitation of polarization multiplexing in optical metasurfaces with engineered noise. *Science* **379**, 294-299 (2023).
